# Supplementary material for: Effects of GABA Supplementation on Intestinal SIgA Secretion and Gut Microbiota in the Healthy and ETEC-Infected Weanling Piglets
Source: Hindawi journal article supplement (doi:10.1155/2020/7368483), 2020-05-26

702 **Supplementary table 1.** Primers used in this study.

| Gene                             | Nucleotide sequence (5'-3') |
|----------------------------------|-----------------------------|
| <i>IFN-<math>\gamma</math>-F</i> | TTCAGCTTTGCGTGACTTTG        |
| <i>IFN-<math>\gamma</math>-R</i> | GGTCCACCATTAGGTACATCTG      |
| <i>IL-4-F</i>                    | CCCGAGTGTC AAGTGGCTTA       |
| <i>IL-4-R</i>                    | TGATGATGCCGAAATAGCAG        |
| <i>IL-10-F</i>                   | GGGCTATTTGTCCTGACTGC        |
| <i>IL-10-R</i>                   | GGGCTCCCTAGTTTCTCTTCC       |
| <i>IL-17-F</i>                   | ATCCTCGTCCCTGTCACTGC        |
| <i>IL-17-R</i>                   | ACATGCTGAGGGAAGTTCTTGTC     |
| <i>IL-1<math>\beta</math>-F</i>  | CAGCCATGGCCATAGTACCT        |
| <i>IL-1<math>\beta</math>-R</i>  | CCACGATGACAGACACCATC        |
| <i>TNF-<math>\alpha</math>-F</i> | ACAGGCCAGCTCCCTCTTAT        |
| <i>TNF-<math>\alpha</math>-R</i> | CCTCGCCCTCCTGAATAAAT        |
| <i>IL-5-F</i>                    | GACTGGTGGCAGAGACCTTGAC      |
| <i>IL-5-R</i>                    | CTTCAATGCATAGTTGGTGATTTGT   |
| <i>IL-13-F</i>                   | CTGACCACCAGCATGCAGTACT      |
| <i>IL-13-R</i>                   | GCTGCAGTCGGAGATGTTGA        |
| <i>pIgR-F</i>                    | AGCCAACCTCACCAACTTCC        |
| <i>pIgR-R</i>                    | CTGCTAATGCCAGACCAC          |
| <i>J-chain-F</i>                 | GTGTGCCCGGATTACTTCCA        |

|                  |                      |
|------------------|----------------------|
| <i>J-chain-R</i> | AGTGGTGAGGTGGGATCAGA |
| <i>β-actin-F</i> | CTGCGGCATCCACGAAACT  |
| <i>β-actin-R</i> | AGGGCCGTGATCTCCTTCTG |

---

704 **Supplementary table 2.** Organ indices of piglets in stage 1 and 2.

|        | CON1        | GABA1       | <i>P</i> value (1) | CON2        | GABA2       | <i>P</i> value (2) |
|--------|-------------|-------------|--------------------|-------------|-------------|--------------------|
| Heart  | 0.492±0.004 | 0.511±0.014 | 0.239              | 0.576±0.055 | 0.613±0.04  | 0.599              |
| Liver  | 2.037±0.054 | 2.0±0.1     | 0.749              | 2.433±0.176 | 2.574±0.146 | 0.553              |
| Spleen | 0.159±0.015 | 0.155±0.017 | 0.870              | 0.198±0.019 | 0.23±0.024  | 0.309              |
| Kidney | 0.548±0.009 | 0.579±0.027 | 0.323              | 0.571±0.024 | 0.588±0.029 | 0.655              |
| Lung   | 1.176±0.037 | 1.153±0.069 | 0.776              | 1.669±0.253 | 1.845±0.261 | 0.639              |

705

706 **Supplementary table 3.** Gut microbial alpha diversity indices of piglets in stage 1 and 2.

|                  | CON1         | GABA1        | <i>P</i> value (1) | CON2         | GABA2          | <i>P</i> value (2) |
|------------------|--------------|--------------|--------------------|--------------|----------------|--------------------|
| Ace              | 562.68±41.39 | 519.47±22.77 | 0.382              | 606.04±9.31  | 627.72±22.43   | 0.393              |
| Chao1            | 559.06±44.77 | 518.77±22.68 | 0.441              | 697.94±9.26  | 1015.20±316.82 | 0.34               |
| Observed Species | 519.67±35.85 | 483.50±27.65 | 0.443              | 565.00±11.57 | 562.17±24.96   | 0.92               |
| Shannon          | 5.947±0.296  | 5.713±0.235  | 0.55               | 6.620±0.140  | 6.222±0.389    | 0.358              |
| Simpson          | 0.941±0.016  | 0.946±0.010  | 0.834              | 0.974±0.003  | 0.939±0.027    | 0.214              |

707

708 **Supplementary figure legends**

709 **Figure S1 Dietary GABA did not affect the growth performance of piglets.**

710 Growth performance of piglets in (A) stage 1 and (B) stage 2. Data are presented as  
711 mean  $\pm$  SEM, analyzed by unpaired t-test with Welch's correction or Mann–Whitney  
712 *U* test.

713

714 **Figure S2 Dietary had little effect on the composition of gut microbiota.** (A) to (E)

715 the relative abundances of main strains in the phylum, class, order, family, and genus  
716 level in normal piglets; (F) PCoA analysis of gut microbiota in normal piglets; (G) to  
717 (H) the relative abundances of main strains in the phylum, class, order, family, and  
718 genus level in ETEC infected piglets; (F) PCoA analysis of gut microbiota in ETEC  
719 infected piglets.

720

**A**

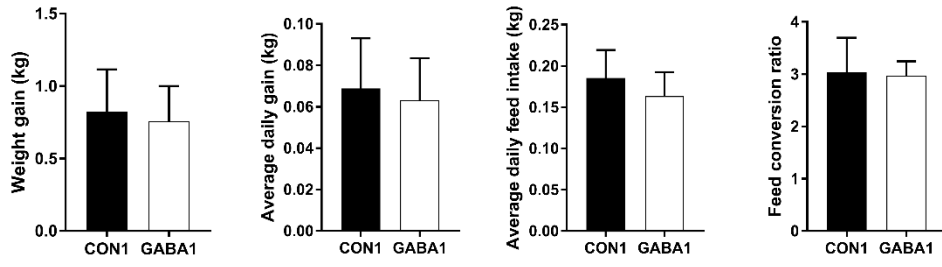

**B**

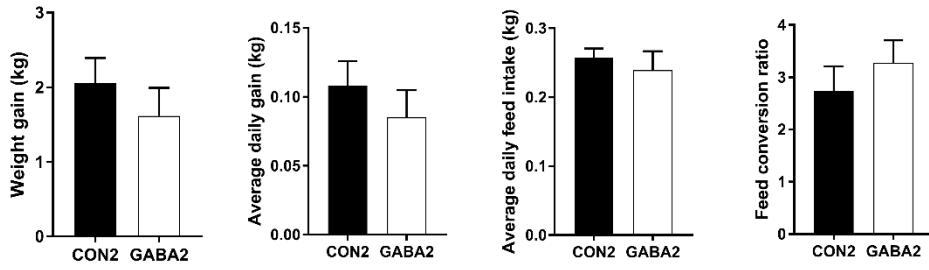

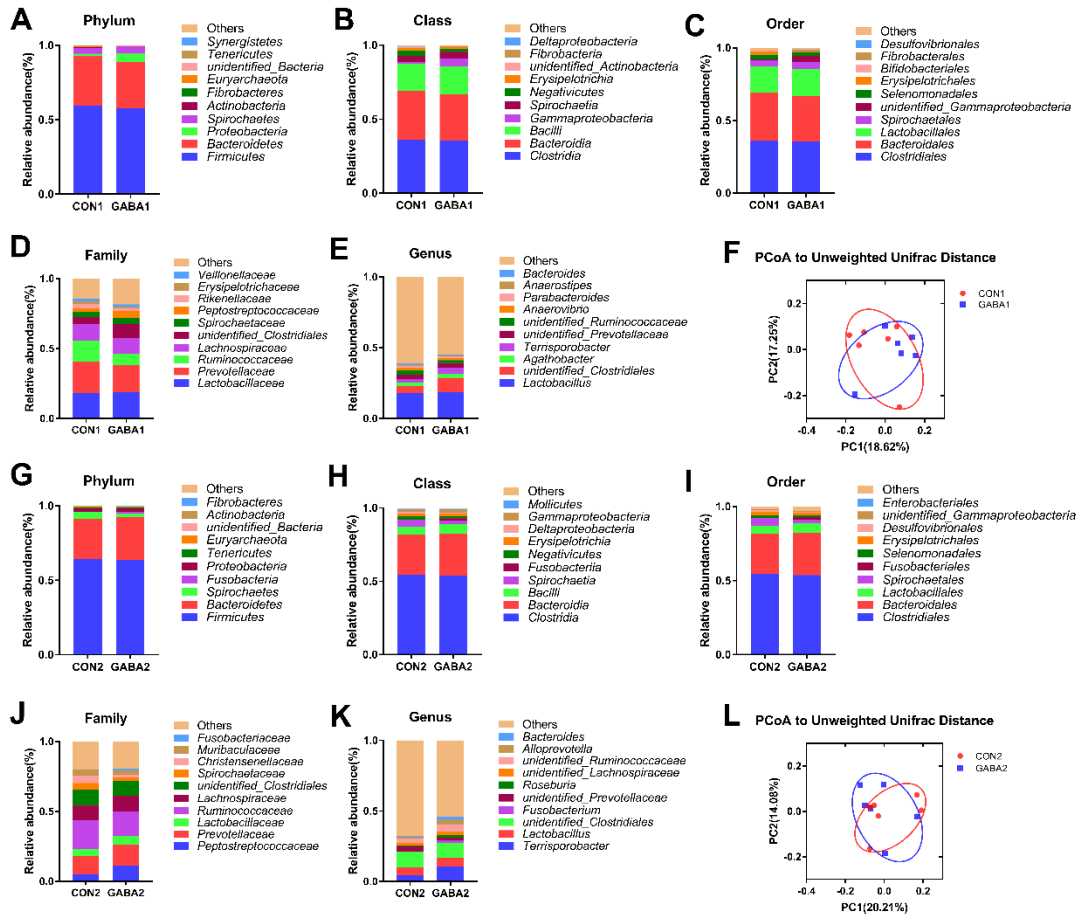

Supplement: f1 [file 7368483.f1.pdf]
